# Supplementary material
Source: MDPI journal article supplement (https://www.mdpi.com/1424-2818/13/11/593)
Supplement: s1 [file s1]

Table S1 – *Beta vulgaris* subsp. *maritima* and *B. macrocarpa* sampling locations

Authors – Maria Manuela Veloso et al.

Correspondence

Email: [mveloso.inrb@gmail.com](mailto:mveloso.inrb@gmail.com)

| <i>Beta</i><br>populations | <i>Beta</i><br><i>vulgaris</i><br>subsp.<br><i>maritima</i> | <i>Beta</i><br><i>macrocarpa</i> | Sampling<br>area                               | Latitude    | Longitude   | Alt<br>(m) |
|----------------------------|-------------------------------------------------------------|----------------------------------|------------------------------------------------|-------------|-------------|------------|
| 1                          | x                                                           |                                  | Langosteira<br>Beach<br>(Finisterra),<br>Spain | 42°55'14''N | 09°15'27''W | 01         |
| 2                          | x                                                           |                                  | Viana do<br>Castelo,<br>Portugal               | 41°41'41''N | 08°49'49''W | 08         |
| 3                          | x                                                           |                                  | Aveiro,<br>Portugal                            | 40°38'39''N | 08°38'43''W | 14         |
| 4                          | x                                                           |                                  | Rio Maior,<br>Portugal                         | 39°21'50''N | 08°56'43''W | 82         |
| 5                          | x                                                           |                                  | Oeiras,<br>Portugal                            | 38°41'36''N | 09°22'21''W | 12         |
| 6                          | x                                                           |                                  | Vaiamonte,<br>Portugal                         | 39°07'13''N | 07°29'23''W | 309        |
| 7                          | x                                                           |                                  | Comporta,<br>Portugal                          | 38°22'43''N | 08°47'07''W | 06         |
| 8                          | x                                                           | x                                | Tavira,<br>Portugal                            | 37°12'26''N | 07°63'52''W | 05         |
| 9                          | x                                                           |                                  | Fuseta,<br>Portugal                            | 37°2'33''N  | 07°44'41''W | 10         |
| 10                         | x                                                           |                                  | Ludo,<br>Portugal                              | 37°02'08''N | 07°57'50''W | 12         |
| 11                         | x                                                           | x                                | Quinta de<br>Marim,<br>Portugal                | 37°01'50''N | 07°48'57''W | 10         |
| 12                         | x                                                           |                                  | Cabo da Gata,<br>Almeria,<br>Spain             | 36°73'69''N | 02°20'66''W | 08         |
| 13                         | x                                                           |                                  | Terceira<br>(Azores<br>Island)                 | 38°39'31''N | 27°12'57''W | 56         |
| 14                         | x                                                           |                                  | Porto Moniz<br>(Madeira<br>Island)             | 32°87'46''N | 17°07'25''W | 80         |
